# Supplementary material
Source: PubMed Central journal article supplement (PMC5338651)
Supplement: supp_pp.17.00057_PP2015-01770DD_Supplemental_Figure_1.pdf [file supp_pp.17.00057_PP2015-01770DD_Supplemental_Figure_1.pdf]

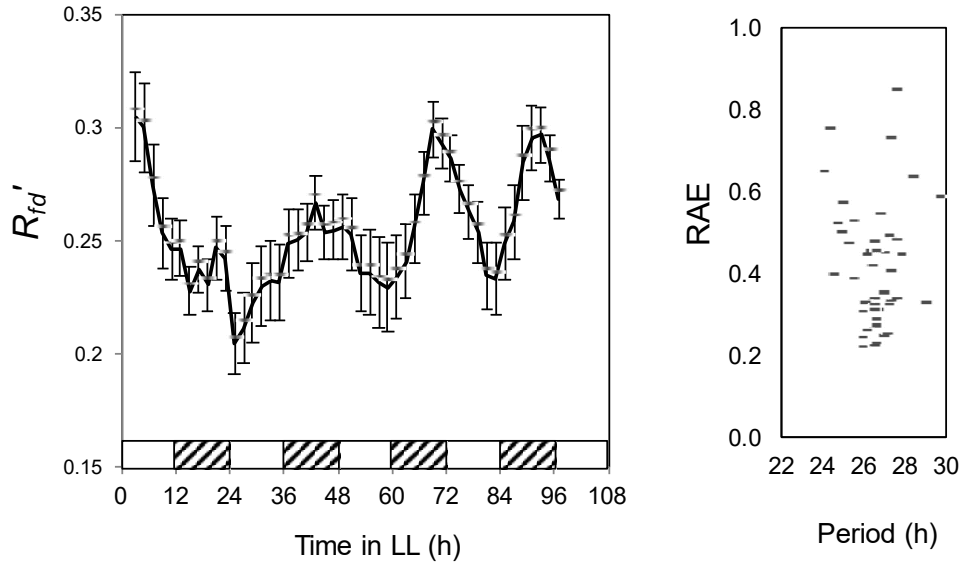

1  
2  
3  
4  
5  
6

**Supplementary Figure 1.**  $R_{fd}'$  is rhythmic in a Bowman barley. Bowman plants were grown in LD for four weeks, then transferred to LL and F measurements taken every two hours. Left panel, circadian rhythms; Right panel, RAE. The graphs were plotted with the SEM.
