# Supplementary material
Source: PubMed Central journal article supplement (PMC5338651)
Supplement: supp_pp.17.00057_PP2015-01770DD_Supplemental_Table_1.pdf [file supp_pp.17.00057_PP2015-01770DD_Supplemental_Table_1.pdf]

1  
2  
3  
4  
5

**Supplementary Table I A comparison of terminology for chlorophyll fluorescence parameters.**

| Maxwell and Johnson | Baker; Litthauer et al. | Walz      | Photon Systems Instruments | <b>This paper</b> | Formula     | Description                                                                                                |
|---------------------|-------------------------|-----------|----------------------------|-------------------|-------------|------------------------------------------------------------------------------------------------------------|
| $F_0$               | $F_0$                   | $F_0$     | $F_0$                      | $F_0$             | Measured    | Minimum F when $Q_A$ is oxidized and there is no non-photochemical quenching                               |
| $F_m$               | $F_m$                   | $F_m$     | $F_m$                      | $F_m$             | Measured    | Maximum F when $Q_A$ is reduced and there is no non-photochemical quenching                                |
| $F_v$               | $F_v$                   | $F_v$     | $F_v$                      | $F_v$             | $F_m - F_0$ | F during transition from dark state with open reaction centers to light state with closed reaction centers |
| $F_v/F_m$           | $F_v/F_m$               | $F_v/F_m$ | $QY^{Max}$                 | $F_v/F_m$         | $F_v/F_m$   | Maximum PSII quantum yield after dark adaptation                                                           |
| -                   | -                       | -         | $F_p$                      | $F_p$             | Measured    | Peak of F after transfer to actinic light when there is photochemical and non-photochemical quenching      |
| $F_t$               | $F_t$                   | $F$       | $F_t^{LSS}$                | $F'$              | Measured    | Steady state F after adaptation to actinic light                                                           |
| $F_m'$              | $F_m'$                  | $F_m'$    | $F_m^{LSS}$                | $F_m'$            | Measured    | Maximum F after adaptation to actinic light when there is non-photochemical quenching                      |
| $F_0'$              | $F_0'$                  | $F_0'$    | $F_0^{LSS}$                | $F_0'$            | Measured    | Steady state minimum F immediately after transfer to dark following adaptation to actinic light            |
| -                   | $Fq'$                   | -         | -                          | -                 | $F_m' - F'$ | Photochemical quenching of fluorescence by                                                                 |

|       |           |         |             |           |                             |                                                                              |
|-------|-----------|---------|-------------|-----------|-----------------------------|------------------------------------------------------------------------------|
|       |           |         |             |           |                             | open PSII centers                                                            |
| $qP$  | $Fq'/Fv'$ | $qP$    | $qP^{LSS}$  | $Fq'/Fv'$ | $(F_m' - F')/(F_m' - F_0')$ | Fraction of open PSII reaction centers                                       |
| -     | -         | $qL$    | -           | -         | $qP \times (F_0'/Ft')$      | Coefficient of photochemical quenching assuming interconnected PSII antennae |
| -     | -         | -       | $Rfd^{LSS}$ | $Rfd'$    | $(F_p - F')/(F')$           | Empiric parameter for plant vitality                                         |
| $NPQ$ | $NPQ$     | $NPQ$   | $NPQ$       | $NPQ'$    | $(F_m - F_m')/(F_m')$       | Steady state non-photochemical quenching in actinic light                    |
| -     | -         | $Y(II)$ | $QY^{LSS}$  | $QY'$     | $(F_m' - F')/(F_m')$        | steady-state PSII quantum yield in light                                     |

6

7 In the literature (') or (light-steady-state, Lss) represent a consecutive measurement  
8 made in actinic light. In this paper (') refers to the fifth measurement (Figure 1) made  
9 in actinic light. Maxwell & Johnson (Maxwell and Johnson 2000); Baker (Baker  
10 2008); Littauer et al. (Littauer et al. 2015); Walz Chlorophyll Fluorescence PAM  
11 (Bavaria, Germany); Photon Systems Instruments (Brno, Czech Republic).

12

13

14

15

16
