# Supplementary material
Source: PubMed Central journal article supplement (PMC5338651)

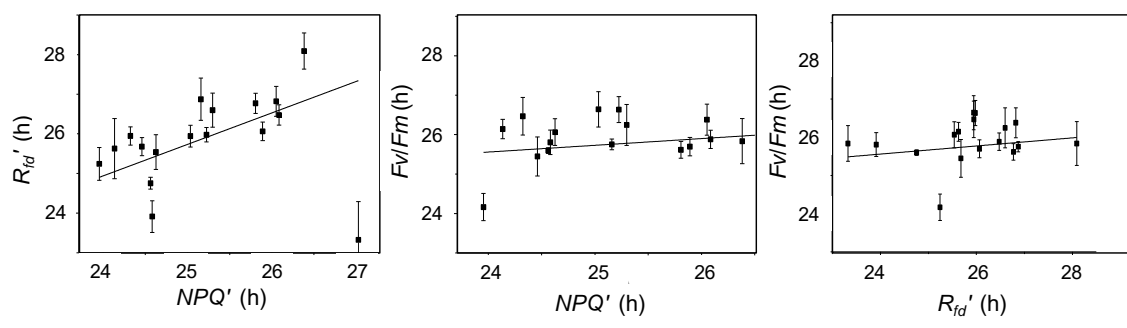

1  
2  
3  
4  
5  
6

**Supplementary Figure 2.** Correlations between the three F parameters used in the B1K screen.

Supplement: supp_pp.17.00057_PP2015-01770DD_Supplemental_Figure_2.pdf [file supp_pp.17.00057_PP2015-01770DD_Supplemental_Figure_2.pdf]
